# Supplementary material for: A multi-center cross-sectional investigation of BRAF V600E mutation in Ameloblastoma
Source: PeerJ. 2025 Apr 3;13:e19137. doi: 10.7717/peerj.19137 (PMC11972564; doi:10.7717/peerj.19137)
Supplement: Supplemental Information 2 [file peerj-13-19137-s002.xlsx]

## Sheet: Table 1
Supplementary Table 1 Detailed data of AM cases at Mahidol University in the central region of Thailand
Code				BRAF V600E IHC						BRAF V600E DNA sequencing			Sex (Male/ Female)					Age at diagnosed (Years)					Tumor duration (Months)				Location (Maxilla/ Mandible)					Histological subtypes (Plexiform/Follicular/Mix)						Radiological appearance (Unilocular/ Multilocular)							Tumor size greatest dimensio n (cm)				Recurrence
MU-AM1				Positive						Positive			Male					16					3				Mandible					Plexiform						Multilocular							3				No recur
MU-AM2				Negative						Negative			Female					32					4				Mandible					Plexiform						Multilocular							5				Recur
MU-AM3				Negative						Negative			Male					64					24				Maxilla					Mix (Follicular+Plexiform)						Multilocular							2				Recur
MU-AM4				Positive						Not done			Female					72					6				Mandible					Mix (Follicular+Plexiform)						Unilocular							6				No recur
MU-AM5				Positive						Positive			Female					19					12				Mandible					Mix (Follicular+Plexiform)						Multilocular							2				No recur
MU-AM6				Positive						Positive			Male					26					0.5				Mandible					Mix (Follicular+Plexiform)						Multilocular							2				No recur
MU-AM7				Positive						Positive			Male					61					1				Mandible					Mix (Follicular+Plexiform)						Multilocular							8				No recur
MU-AM8				Negative						Negative			Female					13					12				Mandible					Plexiform						Multilocular							7				No recur
MU-AM9				Positive						Positive			Female					32					24				Mandible					Plexiform						Multilocular							4				No recur
MU-AM10				Positive						Positive			Female					42					48				Mandible					Follicular						Multilocular							7				No recur
MU-AM11				Positive						Positive			Male					19					12				Mandible					Plexiform						Unilocular							3				No recur
MU-AM12				Positive						Not done			Female					55					12				Mandible					Mix (Follicular+Plexiform)						Multilocular							7				No recur
MU-AM13				Positive						Positive			Female					33					24				Mandible					Mix (Follicular+Plexiform)						Unilocular							0.8				No recur
MU-AM14				Positive						Not done			Male					40					24				Mandible					Plexiform						Unilocular							5				No recur
MU-AM15				Positive						Positive			Male					29					10				Mandible					Mix (Follicular+Plexiform)						Multilocular							6.4				No recur
MU-AM16				Positive						Positive			Male					35					12				Mandible					Mix (Follicular+Plexiform)						Multilocular							8				No recur
MU-AM17				Negative						Negative			Female					28					12				Mandible					Follicular						Multilocular							4				No recur
MU-AM18				Positive						Not done			Female					63					12				Mandible					Follicular						Multilocular							3.5				No recur
MU-AM19				Positive						Not done			Female					47					6				Mandible					Mix (Follicular+Plexiform)						Multilocular							1.8				No recur
MU-AM20				Positive						Positive			Female					20					1				Mandible					Mix (Follicular+Plexiform)						Multilocular							8				No recur
MU-AM21				Positive						Positive			Female					20					12				Mandible					Mix (Follicular+Plexiform)						Multilocular							5				No recur
MU-AM22				Negative						Negative			Male					50					4				Maxilla					Plexiform						Unilocular							1.5				No recur
MU-AM23				Positive						Positive			Male					48					180				Mandible					Follicular						Unilocular							5				No recur
MU-AM24				Positive						Not done			Male					58					60				Mandible					Mix (Follicular+Plexiform)						Multilocular							10				No recur
MU-AM25				Negative						Negative			Male					30					2				Mandible					Mix (Follicular+Plexiform)						Multilocular							3				No recur
MU-AM26				Negative						Negative			Male					63					6				Mandible					Mix (Follicular+Plexiform)						Unilocular							2.5				No recur
MU-AM27				Positive						Positive			Male					20					2				Mandible					Plexiform						Multilocular							3.2				No recur
MU-AM28				Negative						Negative			Male					35					3				Maxilla					Mix (Follicular+Plexiform)						Unilocular							3.6				No recur
MU-AM29				Positive						Not done			Female					64					60				Mandible					Mix (Follicular+Plexiform)						Multilocular							3				No recur
MU-AM30				Positive						Not done			Female					23					6				Mandible					Mix (Follicular+Plexiform)						Unilocular							6.5				No recur
MU-AM31				Negative						Negative			Male					51					9				Mandible					Follicular						Multilocular							8				No recur
MU-AM32				Positive						Positive			Female					30					10				Mandible					Mix (Follicular+Plexiform)						Unilocular							7				No recur
MU-AM33				Positive						Positive			Male					37					60				Mandible					Follicular						Multilocular							8				No recur
MU-AM34				Positive						Not done			Female					42					24				Mandible					Mix (Follicular+Plexiform)						Unilocular							6.5				No recur
MU-AM35				Positive						Not done			Male					20					7				Mandible					Mix (Follicular+Plexiform)						Multilocular							9				No recur
MU-AM36				Negative						Negative			Male					13					11				Mandible					Mix (Follicular+Plexiform)						Unilocular							5				No recur
MU-AM37				Positive						Positive			Female					51					10				Mandible					Follicular						Multilocular							15				No recur
MU-AM38				Positive						Positive			Female					34					1				Maxilla					Mix (Follicular+Plexiform)						Multilocular							4				No recur
MU-AM39				Positive						Not done			Male					15					12				Maxilla					Mix (Follicular+Plexiform)						Unilocular							3.6				No recur
MU-AM40				Positive						Positive			Male					24					12				Mandible					Mix (Follicular+Plexiform)						Multilocular							6.5				No recur
MU-AM41				Positive						Positive			Female					21					12				Mandible					Mix (Follicular+Plexiform)						Multilocular							3				No recur
MU-AM42				Positive						Not done			Male					17					1				Mandible					Mix (Follicular+Plexiform)						Unilocular							4				No recur
MU-AM43				Positive						Positive			Female					32					3				Mandible					Follicular						Multilocular							3				No recur
MU-AM44				Negative						Negative			Male					29					5				Mandible					Plexiform						Multilocular							10				No recur
MU-AM45				Negative						Negative			Male					24					12				Mandible					Plexiform						Unilocular							8				No recur
MU-AM46				Positive						Positive			Female					13					24				Mandible					Mix (Follicular+Plexiform)						Multilocular							5				No recur
MU-AM47				Negative						Negative			Female					21					36				Mandible					Follicular						Multilocular							6				No recur
MU-AM48				Positive						Positive			Male					28					1				Mandible					Follicular						Multilocular							3				No recur
MU-AM49				Positive						Not done			Female					16					10				Mandible					Mix (Follicular+Plexiform)						Unilocular							5				No recur
MU-AM50				Positive						Not done			Male					11					4				Mandible					Follicular						Multilocular							2				No recur
MU-AM51				Negative						Negative			Male					66					12				Mandible					Follicular						Multilocular							3				No recur
MU-AM52				Positive						Not done			Female					42					24				Mandible					Follicular						Multilocular							5				No recur
MU-AM53				Positive						Positive			Male					24					15				Mandible					Plexiform						Multilocular							5.2				No recur
MU-AM54				Positive						Not done			Female					29					12				Mandible					Follicular						Multilocular							6.2				Recur
MU-AM55				Positive						Positive			Male					41					24				Mandible					Plexiform						Multilocular							4				No recur
MU-AM56				Negative						Negative			Male					36					5				Mandible					Plexiform						Unilocular							7				Recur
MU-AM57				Positive						Positive			Male					48					12				Mandible					Follicular						Unilocular							3				No recur
MU-AM58				Negative						Negative			Female					52					8				Maxilla					Plexiform						Multilocular							4.5				No recur
MU-AM59				Positive						Not done			Male					24					7				Mandible					Follicular						Multilocular							6				No recur
MU-AM60				Positive						Not done			Male					13					2				Mandible					Follicular						Multilocular							5				No recur
MU-AM61				Positive						Positive			Female					15					36				Mandible					Plexiform						Unilocular							3.5				No recur
MU-AM62				Positive						Positive			Female					37					9				Mandible					Follicular						Multilocular							7				No recur
MU-AM63				Positive						Positive			Female					37					12				Mandible					Plexiform						Multilocular							8				No recur
MU-AM64				Positive						Positive			Male					18					7				Mandible					Plexiform						Multilocular							3				No recur
MU-AM65				Positive						Not done			Male					11					6				Mandible					Plexiform						Unilocular							3				No recur
MU-AM66				Positive						Not done			Female					21					24				Mandible					Follicular						Multilocular							7				Recur
MU-AM67				Negative						Negative			Female					36					14				Mandible					Follicular						Multilocular							7				No recur
MU-AM68				Negative						Negative			Male					65					5				Mandible					Plexiform						Unilocular							1.5				No recur
MU-AM69				Positive						Positive			Female					26					4				Mandible					Plexiform						Multilocular							3				No recur
MU-AM70				Negative						Negative			Male					33					24				Mandible					Mix (Follicular+Plexiform)						Multilocular							8				No recur
MU-AM71				Positive						Positive			Male					17					13				Mandible					Mix (Follicular+Plexiform)						Multilocular							7				No recur
MU-AM72				Negative						Negative			Female					38					192				Mandible					Follicular						Multilocular							7				Recur
MU-AM73				Positive						Positive			Female					33					6				Mandible					Mix (Follicular+Plexiform)						Multilocular							3				Recur
MU-AM74				Positive						Positive			Male					42					24				Mandible					Follicular						Multilocular							4.2				No recur
MU-AM75				Positive						Positive			Female					26					12				Mandible					Plexiform						Multilocular							1				No recur
MU-AM76				Positive						Positive			Male					18					8				Mandible					Plexiform						Unilocular							1.6				No recur
MU-AM77				Positive						Positive			Female					25					3				Maxilla					Plexiform						Unilocular							4				No recur
MU-AM78				Positive						Not done			Male					38					22				Mandible					Mix (Follicular+Plexiform)						Multilocular							1.2				No recur
MU-AM79				Positive						Not done			Male					15					4				Mandible					Plexiform						Multilocular							1.5				No recur
MU-AM80				Positive						Positive			Female					31					48				Mandible					Follicular						Multilocular							4.9				No recur
MU-AM81				Positive						Positive			Female					55					12				Maxilla					Follicular						Multilocular							4.8				No recur
MU-AM82				Positive						Not done			Male					48					24				Mandible					Plexiform						Multilocular							7				No recur
MU-AM83				Positive						Positive			Female					14					8				Mandible					Plexiform						Multilocular							8				No recur
Denoted: MU; Mahidol University, AM; conventional ameloblastoma, IHC; Immunohistochemistry
Supplementary Table 2 Detailed data of AM cases at Chiang Mai University in the northern region of Thailand
Code				BRAF V600E IHC						Sex (Male/Female)					Age at diagnosed (Years)				Tumor duration (Months)				Location (Maxilla/Mandible)							Histological subtypes (Plexiform/Follicular/Mix)						Radiological appearance (Unilocular/Multilocular)								Tumor size greatest dimension (cm)					Recurrence
CMU-AM1				Positive						Male					14				12				Mandible							Mix (Follicular+Plexiform)						Multilocular								7					No recur
CMU-AM2				Positive						Female					36				5				Mandible							Follicular						Unilocular								2					Recur
CMU-AM3				Negative						Male					19				4				Mandible							Mix (Follicular+Plexiform)						Unilocular								3					Recur
CMU-AM4				Positive						Male					44				120				Mandible							Plexiform						Unilocular								4					No recur
CMU-AM5				Positive						Male					39				2				Mandible							Follicular						Unilocular								1.8					No recur
CMU-AM6				Positive						Male					56				2				Mandible							Mix (Follicular+Plexiform)						Multilocular								1.5					No recur
CMU-AM7				Positive						Male					14				1				Mandible							Plexiform						Unilocular								8.5					No recur
CMU-AM8				Positive						Female					55				60				Mandible							Follicular						Unilocular								4					No recur
CMU-AM9				Negative						Female					34				0.5				Mandible							Plexiform						Unilocular								1.3					No recur
CMU-AM10				Positive						Male					22				24				Mandible							Plexiform						Multilocular								1					No recur
CMU-AM11				Positive						Female					51				12				Mandible							Mix (Follicular+Plexiform)						Unilocular								2					No recur
CMU-AM12				Negative						Male					36				0.5				Maxilla							Plexiform						Unilocular								3.5					No recur
CMU-AM13				Positive						Female					36				36				Mandible							Plexiform						Multilocular								10					No recur
CMU-AM14				Negative						Male					61				1				Mandible							Plexiform						Unilocular								6					No recur
CMU-AM15				Positive						Female					73				1				Mandible							Mix (Follicular+Plexiform)						Unilocular								0.8					No recur
CMU-AM16				Negative						Male					22				0.5				Mandible							Mix (Follicular+Plexiform)						Multilocular								8					No recur
CMU-AM17				Positive						Female					60				7				Mandible							Plexiform						Unilocular								1					No recur
CMU-AM18				Positive						Female					48				8				Mandible							Plexiform						Unilocular								2					Recur
CMU-AM19				Positive						Male					52				12				Mandible							Mix (Follicular+Plexiform)						Unilocular								2					Recur
CMU-AM20				Positive						Male					51				3				Mandible							Follicular						Unilocular								2.7					No recur
CMU-AM21				Positive						Male					55				1				Mandible							Mix (Follicular+Plexiform)						Multilocular								6					Recur
CMU-AM22				Positive						Male					23				18				Mandible							Mix (Follicular+Plexiform)						Multilocular								3					No recur
CMU-AM23				Positive						Female					21				5				Mandible							Plexiform						Unilocular								1					No recur
CMU-AM24				Positive						Male					63				168				Mandible							Plexiform						Multilocular								14.5					No recur
CMU-AM25				Positive						Female					55				12				Mandible							Follicular						Multilocular								1.2					No recur
CMU-AM26				Positive						Female					45				13				Mandible							Follicular						Multilocular								0.5					Recur
CMU-AM27					Positive					Female					56				7				Mandible							Follicular						Multilocular								1					Recur
CMU-AM28					Negative					Male					24				3				Mandible							Mix (Follicular+Plexiform)						Multilocular								11.8					Recur
CMU-AM29					Positive					Male					21				12				Mandible							Plexiform						Multilocular								2					No recur
CMU-AM30					Positive					Female					24				0.5				Mandible							Plexiform						Unilocular								3.5					No recur
CMU-AM31					Positive					Male					19				6				Mandible							Follicular						Unilocular								3					No recur
CMU-AM32					Positive					Female					22				3				Mandible							Plexiform						Unilocular								2.75					No recur
CMU-AM33					Negative					Female					16				7				Mandible							Plexiform						Multilocular								3					No recur
CMU-AM34					Negative					Male					71				3				Mandible							Follicular						Multilocular								4					No recur
CMU-AM35					Positive					Male					60				6				Mandible							Mix (Follicular+Plexiform)						Multilocular								9					No recur
CMU-AM36					Positive					Female					12				1				Maxilla							Follicular						Multilocular								6.5					No recur
CMU-AM37					Negative					Female					57				6				Mandible							Mix (Follicular+Plexiform)						Multilocular								6					No recur
CMU-AM38					Positive					Female					59				36				Mandible							Plexiform						Multilocular								1					No recur
CMU-AM39					Positive					Male					31				2				Mandible							Follicular						Multilocular								2.2					No recur
CMU-AM40					Negative					Male					66				14				Mandible							Plexiform						Unilocular								1.5					No recur
CMU-AM41					Negative					Male					20				1				Mandible							Plexiform						Multilocular								2.5					No recur
CMU-AM42					Negative					Male					76				18				Mandible							Follicular						Unilocular								1					No recur
CMU-AM43					Negative					Male					21				7				Mandible							Plexiform						Multilocular								9.5					No recur
CMU-AM44					Positive					Male					72				48				Mandible							Mix (Follicular+Plexiform)						Unilocular								7					No recur
CMU-AM45					Negative					Female					59				5				Mandible							Plexiform						Multilocular								3					No recur
CMU-AM46					Positive					Female					23				36				Mandible							Plexiform						Multilocular								10					No recur
CMU-AM47					Negative					Male					36				4				Mandible							Plexiform						Multilocular								2					No recur
CMU-AM48					Negative					Male					12				7				Mandible							Plexiform						Unilocular								6					No recur
CMU-AM49					Positive					Male					58				6				Mandible							Follicular						Multilocular								3					No recur
CMU-AM50					Positive					Male					54				11				Mandible							Follicular						Unilocular								6					No recur
CMU-AM51					Positive					Male					37				5				Mandible							Follicular						Unilocular								5					No recur
CMU-AM52					Positive					Male					55				5				Mandible							Follicular						Multilocular								3					No recur
CMU-AM53					Negative					Male					23				6				Mandible							Plexiform						Multilocular								5					No recur
CMU-AM54					Positive					Male					40				5				Mandible							Follicular						Unilocular								2					No recur
Denoted: CMU; Chiang Mai University, AM; conventional ameloblastoma, IHC; Immunohistochemistry
Supplementary Table 3 Detailed data of AM cases at Prince of Songkhla University in the southern region of Thailand
Code				BRAF V600E IHC					Sex (Male/Female)					Age at diagnosed (Years)				Tumor duration (Months)					Location (Maxilla/Mandible)								Histological subtypes (Plexiform/Follicular/Mix)						Radiological appearance (Unilocular/Multilocular)									Tumor size greatest dimension (cm)
PSU-AM1				Positive					Male					56				3					Maxilla								Follicular						Multilocular									3
PSU-AM2				Positive					Male					55				4					Maxilla								Follicular						Multilocular									3.5
PSU-AM3				Positive					Male					47				3					Mandible								Mix (Follicular+Plexiform)						Multilocular									4
PSU-AM4				Positive					Male					40				24					Mandible								Mix (Follicular+Plexiform)						Multilocular									2
PSU-AM5				Positive					Female					51				2					Mandible								Follicular						Multilocular									1
PSU-AM6				Negative					Female					25				48					Mandible								Mix (Follicular+Plexiform)						Multilocular									6.5
PSU-AM7				Positive					Male					26				1					Mandible								Mix (Follicular+Plexiform)						Multilocular									3
PSU-AM8				Negative					Male					19				12					Mandible								Mix (Follicular+Plexiform)						Multilocular									6
PSU-AM9				Positive					Male					18				4					Mandible								Mix (Follicular+Plexiform)						Multilocular									2
PSU-AM10				Negative					Female					53				12					Mandible								Follicular						Multilocular									6.5
PSU-AM11				Positive					Male					58				24					Mandible								Mix (Follicular+Plexiform))						Multilocular									7
PSU-AM12				Positive					Male					15				12					Mandible								Follicular						Multilocular									6.5
PSU-AM13				Negative					Male					15				13					Mandible								Follicular						Multilocular									6.5
PSU-AM14				Negative					Female					14				3					Mandible								Plexiform						Unilocular									5.5
PSU-AM15				Negative					Female					14				3					Mandible								Follicular						Multilocular									2.5
PSU-AM16				Positive					Female					69				6					Mandible								Follicular						Multilocular									5
PSU-AM17				Negative					Female					21				2					Mandible								Plexiform						Unilocular									2
PSU-AM18				Positive					Male					57				12					Mandible								Follicular						Unilocular									6.5
PSU-AM19				Positive					Male					49				12					Mandible								Mix (Follicular+Plexiform)						Multilocular									3
PSU-AM20				Positive					Male					48				36					Mandible								Follicular						Multilocular									6.5
PSU-AM21				Positive					Male					51				4					Mandible								Follicular						Multilocular									3
PSU-AM22				Negative					Male					52				2					Maxilla								Follicular						Unilocular									1
PSU-AM23				Negative					Male					67				3					Mandible								Follicular						Multilocular									4
PSU-AM24				Negative					Female					25				2					Mandible								Mix (Follicular+Plexiform)						Unilocular									1
PSU-AM25				Negative					Female					60				3					Mandible								Follicular						Multilocular									4
PSU-AM26				Positive					Female					53				96					Mandible								Follicular						Unilocular									2.5
PSU-AM27				Negative					Female					31				36					Mandible								Follicular						Multilocular									3
PSU-AM28				Positive					Male					62				2					Maxilla								Follicular						Multilocular									4
PSU-AM29				Negative					Male					68				12					Maxilla								Plexiform						Multilocular									6
PSU-AM30				Negative					Female					79				1					Maxilla								Plexiform						Unilocular									3
PSU-AM31				Negative					Male					13				3					Mandible								Plexiform						Unilocular									5
PSU-AM32				Positive					Female					21				2					Mandible								Follicular						Unilocular									4
PSU-AM33				Negative					Female					23				3					Mandible								Follicular						Multilocular									4
PSU-AM34				Positive					Male					57				36					Mandible								Mix (Follicular+Plexiform)						Multilocular									7.5
PSU-AM35				Positive					Female					19				1					Mandible								Mix (Follicular+Plexiform)						Unilocular									6
PSU-AM36				Negative					Female					37				12					Mandible								Follicular						Unilocular									5
PSU-AM37				Positive					Male					20				14					Mandible								Mix (Follicular+Plexiform)						Multilocular									6.5
PSU-AM38				Positive					Female					39				61					Mandible								Mix (Follicular+Plexiform)						Multilocular									3
PSU-AM39				Positive					Male					78				6					Mandible								Mix (Follicular+Plexiform)						Unilocular									2.5
PSU-AM40				Negative					Female					25				25					Mandible								Plexiform						Unilocular									3
PSU-AM41				Negative					Male					16				13					Mandible								Plexiform						Multilocular									6
PSU-AM42				Positive					Male					16				12					Mandible								Mix (Follicular+Plexiform)						Unilocular									2
PSU-AM43				Positive					Female					59				12					Mandible								Follicular						Multilocular									2
PSU-AM44				Positive					Male					63				1					Maxilla								Follicular						Multilocular									1
PSU-AM45				Positive					Male					18				6					Mandible								Plexiform						Multilocular									5
PSU-AM46				Positive					Female					30				13					Mandible								Follicular						Multilocular									8
PSU-AM47				Negative					Female					33				12					Mandible								Follicular						Multilocular									1
PSU-AM48				Positive					Female					19				1					Mandible								Follicular						Unilocular									7
PSU-AM49				Positive					Female					33				36					Mandible								Plexiform						Unilocular									3
PSU-AM50				Positive					Male					22				48					Mandible								Mix (Follicular+Plexiform)						Multilocular									6.5
PSU-AM51				Positive					Female					36				1					Mandible								Follicular						Unilocular									6
PSU-AM52				Negative					Male					51				24					Mandible								Follicular						Multilocular									5
PSU-AM53				Positive					Female					57				3					Mandible								Follicular						Unilocular									3
PSU-AM54				Negative					Male					22				0.16					Mandible								Plexiform						Multilocular									5
PSU-AM55				Positive					Male					39				2					Mandible								Follicular						Multilocular									5
PSU-AM56				Positive					Female					24				36					Mandible								Mix (Follicular+Plexiform)						Unilocular									3
PSU-AM57				Positive					Male					19				2					Mandible								Mix (Follicular+Plexiform)						Unilocular									5
Denoted: PSU; Prince of Songkhla University AM; conventional ameloblastoma, IHC; Immunohistochemistry
Supplementary Table 4 Detailed data of AM cases at Khon Kaen University in the northeastern region of Thailand
Code		BRAF V600E IHC						Sex (Male/Female)					Age at diagnosed (Years)				Tumor duration (Months)				Location (Maxilla/Mandible)							Histological subtypes (Plexiform/Follicular/Mix)							Radiological appearance (Unilocular/Multilocular)								Tumor size greatest dimension (cm)					Recurrence
KA1		Positive						Female					24				8				Mandible							Plexiform							Unilocular								2.5					No recur
KA2		Positive						Male					20				2				Mandible							Plexiform							Unilocular								4					No recur
KA3		Positive						Male					28				0.5				Mandible							Mix (Follicular+Plexiform)							Multilocular								3					No recur
KA4		Positive						Male					41				72				Mandible							Follicular							Multilocular								6					No recur
KA5		Positive						Female					33				5				Maxilla							Follicular							Multilocular								7					No recur
KA6		Positive						Male					65				12				Mandible							Follicular							Unilocular								8					No recur
KA7		Positive						Female					24				36				Mandible							Mix (Follicular+Plexiform)							Unilocular								5					No recur
KA8		Positive						Male					54				1				Maxilla							Follicular							Multilocular								2					No recur
KA9		Negative						Male					37				97				Maxilla							Follicular							Unilocular								3					No recur
KA10		Positive						Male					26				96				Mandible							Plexiform							Multilocular								8					No recur
KA11		Positive						Female					18				72				Mandible							Plexiform							Multilocular								10					No recur
KA12		Negative						Female					22				12				Mandible							Follicular							Multilocular								3					No recur
KA13		Positive						Male					42				3				Mandible							Follicular							Multilocular								6					No recur
KA14		Positive						Male					46				2				Maxilla							Follicular							Multilocular								8					No recur
KA15		Positive						Female					24				36				Mandible							Follicular							Multilocular								4					No recur
KA16		Positive						Female					58				6				Mandible							Follicular							Multilocular								3					No recur
KA17		Positive						Female					32				6				Mandible							Follicular							Multilocular								5					No recur
KA18		Positive						Female					28				0.5				Mandible							Mix (Follicular+Plexiform)							Unilocular								4					No recur
KA19		Positive						Male					38				2				Maxilla							Follicular							Multilocular								7					No recur
KA20		Positive						Female					21				12				Maxilla							Follicular							Multilocular								3					No recur
KA21		Positive						Male					41				24				Mandible							Follicular							Multilocular								5					No recur
KA22		Negative						Female					31				120				Mandible							Follicular							Multilocular								2					No recur
KA23		Positive						Male					30				5				Mandible							Mix (Follicular+Plexiform)							Multilocular								4					No recur
KA24		Positive						Female					12				12				Mandible							Mix (Follicular+Plexiform)							Unilocular								1					No recur
KA25		Negative						Male					50				12				Mandible							Mix (Follicular+Plexiform)							Multilocular								3					No recur
KA26		Negative						Female					57				12				Mandible							Follicular							Multilocular								7					No recur
KA27		Positive						Female					73				6				Mandible							Follicular							Unilocular								4					No recur
KA28		Positive						Female					38				60				Mandible							Follicular							Multilocular								8					No recur
KA29		Positive						Male					46				204				Maxilla							Follicular							Multilocular								4					No recur
KA30		Positive						Male					26				60				Mandible							Mix (Follicular+Plexiform)							Multilocular								8					No recur
KA31		Positive						Male					57				72				Mandible							Follicular							Multilocular								10					Recur
KA32		Positive						Female					54				5				Mandible							Follicular							Multilocular								3					Recur
KA33		Positive						Male					62				2				Mandible							Mix (Follicular+Plexiform)							Multilocular								3					No recur
Denoted: KKU; Khon Kaen University AM; conventional ameloblastoma, IHC; Immunohistochemistry
Supplementary Table 5 Detailed data of UA cases at Mahidol University in the central region of Thailand
Code				BRAF V600E IHC					Sex (Male/Female)						Age at diagnosed (Years)				Tumor duration (Months)						Location (Maxilla/Mandible)								Histological subtypes (luminal/Intraluminal/mural)							Tumor size greatest dimension (cm)				Recurrence
MU-UA1				Negative					Male						41				12						Mandible								Mural							1				No recur
MU-UA2				Positive					Female						14				3						Mandible								Mural							6				No recur
MU-UA3				Positive					Female						33				2						Mandible								Mural							5				No recur
MU-UA4				Positive					Male						35				7						Mandible								Mural							5.5				No recur
MU-UA5				Positive					Male						38				48						Mandible								Intraluminal							8				Recur
MU-UA6				Positive					Male						17				12						Mandible								Luminal							4				No recur
MU-UA7				Positive					Female						25				8						Mandible								Luminal							1				No recur
MU-UA8				Positive					Female						19				1						Mandible								Luminal							2				No recur
MU-UA9				Positive					Male						10				3						Mandible								Mural							2				No recur
MU-UA10				Positive					Female						18				24						Mandible								Intraluminal							8.5				No recur
MU-UA11				Positive					Female						15				1						Mandible								Mural							2				No recur
MU-UA12				Positive					Female						33				5						Mandible								Mural							2				No recur
MU-UA13				Positive					Female						33				120						Mandible								Mural							3.4				No recur
MU-UA14				Positive					Female						20				5						Mandible								Intraluminal							4				Recur
MU-UA15				Positive					Male						37				24						Mandible								Intraluminal							5.7				No recur
MU-UA16				Positive					Male						15				1						Mandible								Mural							1.7				No recur
MU-UA17				Positive					Male						26				8						Mandible								Mural							7				No recur
MU-UA18				Positive					Male						33				9						Mandible								Mural							4				No recur
MU-UA19				Positive					Female						12				3						Mandible								Intraluminal							3				No recur
MU-UA20				Positive					Female						29				13						Mandible								Intraluminal							1				No recur
MU-UA21				Positive					Male						42				4						Mandible								Mural							7				No recur
MU-UA22				Positive					Male						58				7						Maxilla								Mural							1.5				No recur
MU-UA23				Positive					Male						13				12						Mandible								Mural							2.9				Recur
MU-UA24				Positive					Female						30				21						Mandible								Mural							2				No recur
MU-UA25				Positive					Female						31				48						Mandible								Luminal							3				No recur
MU-UA26				Positive					Male						28				2						Maxilla								Mural							7				No recur
MU-UA27				Positive					Male						47				3						Mandible								Mural							2				No recur
MU-UA28				Positive					Male						19				18						Mandible								Intraluminal							4				No recur
MU-UA29				Positive					Female						36				2						Mandible								Mural							2				No recur
MU-UA30				Positive					Female						77				72						Mandible								Mural							3				No recur
MU-UA31				Positive					Male						19				24						Mandible								Mural							6.5				No recur
MU-UA32				Negative					Female						67				2						Maxilla								Intraluminal							4				No recur
MU-UA33				Positive					Female						29				9						Mandible								Intraluminal							5.8				No recur
MU-UA34				Positive					Male						48				4						Mandible								Intraluminal							3				No recur
MU-UA35				Positive					Male						18				7						Mandible								Intraluminal							3.5				No recur
MU-UA36				Negative					Male						58				6						Maxilla								Mural							1				No recur
MU-UA37				Positive					Female						14				12						Mandible								Intraluminal							3				No recur
MU-UA38				Positive					Male						28				8						Mandible								Mural							4				No recur
MU-UA39				Positive					Male						28				13						Mandible								Mural							7				No recur
MU-UA40				Positive					Female						19				96						Mandible								Mural							3				Recur
MU-UA41				Positive					Male						28				12						Mandible								Luminal							5				No recur
MU-UA42				Negative					Female						48				2						Mandible								Mural							1.5				No recur
MU-UA43				Positive					Female						28				0.5						Mandible								Mural							3				No recur
MU-UA44				Positive					Male						11				15						Mandible								Intraluminal							2				Recur
MU-UA45				Positive					Male						11				2						Mandible								Luminal							3				No recur
MU-UA46				Positive					Female						19				1						Mandible								Mural							2				No recur
MU-UA47				Positive					Male						81				24						Mandible								Mural							1.2				No recur
MU-UA48				Positive					Male						35				2						Maxilla								Intraluminal							1				Recur
MU-UA49				Positive					Female						18				84						Mandible								Intraluminal							2				Recur
MU-UA50				Positive					Female						18				96						Mandible								Mural							1.7				Recur
MU-UA51				Positive					Male						19				1						Mandible								Mural							1.7				No recur
MU-UA52				Positive					Male						50				4						Mandible								Mural							3				No recur
Denoted: MU; Mahidol University, UA; Unicystic ameloblastoma, IHC; Immunohistochemistry
Supplementary Table 6 Detailed data of UA cases at Chiang Mai University in the northern region of Thailand
Code						BRAF V600E IHC					Sex (Male/ Female)	Age at diagnosed (Years)						Tumor duration (Months)				Location (Maxilla/Mandible)							Histological subtypes (luminal/Intraluminal/mural)								Tumor size greatest dimension (cm)					Recurrence
CMU-UA1						Positive					Male	29						3				Mandible							Mural								0.9					No recur
CMU-UA2						Positive					Male	19						2				Mandible							Intraluminal								2.3					No recur
CMU-UA3						Positive					Female	52						24				Mandible							Mural								3					No recur
CMU-UA4						Positive					Female	11						4				Mandible							Mural								5					No recur
CMU-UA5						Negative					Female	21						12				Mandible							Mural								3					No recur
CMU-UA6						Positive					Male	15						2				Maxilla							Intraluminal								1.8					No recur
CMU-UA7						Positive					Female	51						1				Mandible							Luminal								2					No recur
CMU-UA8						Positive					Female	29						6				Mandible							Luminal								2.2					No recur
CMU-UA9						Positive					Male	16						8				Mandible							Mural								1.7					No recur
CMU-UA10						Positive					Female	18						5				Mandible							Mural								1.2					No recur
CMU-UA11						Positive					Female	17						12				Mandible							Mural								2					No recur
CMU-UA12						Negative					Female	23						1.5				Mandible							Intraluminal								2					No recur
CMU-UA13						Positive					Female	11						2				Mandible							Mural								1.5					No recur
CMU-UA14						Negative					Female	20						5				Mandible							Luminal								2.2					Recur
CMU-UA15						Negative					Female	27						7				Mandible							Luminal								2					No recur
CMU-UA16						Negative					Male	12						3				Mandible							Mural								5					No recur
CMU-UA17						Positive					Female	17						3				Mandible							Mural								5.5					No recur
CMU-UA18						Negative					Male	12						12				Mandible							Mural								3.5					No recur
CMU-UA19						Negative					Female	20						3				Mandible							Mural								3					No recur
CMU-UA20						Negative					Female	16						14				Mandible							Mural								2					No recur
CMU-UA21						Positive					Female	41						6				Mandible							Mural								1.9					No recur
CMU-UA22						Negative					Female	55						5				Mandible							Intraluminal								1.3					No recur
CMU-UA23						Negative					Male	14						6				Mandible							Mural								10					No recur
CMU-UA24						Negative					Female	17						1				Mandible							Mural								0.9					No recur
CMU-UA25						Positive					Female	19						9				Mandible							Mural								2					No recur
CMU-UA26						Negative					Male	14						4				Mandible							Luminal								2					No recur
CMU-UA27						Negative					Male	11						3				Mandible							Intraluminal								5					No recur
CMU-UA28						Negative					Male	18						1				Mandible							Mural								4					No recur
CMU-UA29						Negative					Female	54						3				Mandible							Luminal								6					No recur
CMU-UA30						Negative					Female	58						0.5				Maxilla							Mural								1.7					No recur
CMU-UA31						Negative					Male	63						1				Mandible							Luminal								1.3					No recur
CMU-UA32						Negative					Female	12						6				Maxilla							Luminal								1					No recur
Denoted: CMU; Chiang Mai University, UA; Unicystic ameloblastoma, IHC; Immunohistochemistry
Supplementary Table 7 Detailed data of UA cases at Prince of Songkhla University in the southern region of Thailand
Code			BRAF V600E IHC						Sex (Male/Female)						Age at diagnosed (Years)				Tumor duration (Months)				Location (Maxilla/Mandible)								Histological subtypes (luminal/Intraluminal/mural)								Tumor size greatest dimension (cm)				Recurrence
PSU-UA1			Negative						Female						12				12				Mandible								Mural								2				No recur
PSU-UA2			Positive						Female						14				12				Mandible								Mural								2				No recur
PSU-UA3			Positive						Female						14				2				Mandible								Mural								3				No recur
PSU-UA4			Negative						Female						19				3				Mandible								Mural								2				No recur
PSU-UA5			Negative						Male						15				3				Mandible								Mural								4				No recur
PSU-UA6			Positive						Female						17				0.7				Mandible								Mural								5				No recur
PSU-UA7			Negative						Female						22				5				Mandible								Luminal								1				Recur
PSU-UA8			Positive						Female						41				36				Mandible								Mural								3				No recur
PSU-UA9			Negative						Male						12				2				Mandible								Mural								5				No recur
PSU-UA10			Negative						Female						15				2				Mandible								Mural								3.5				No recur
PSU-UA11			Negative						Male						32				3				Mandible								Mural								4.5				No recur
PSU-UA12			Negative						Female						12				4				Mandible								Mural								2				No recur
PSU-UA13			Positive						Male						24				24				Mandible								Mural								3.5				No recur
PSU-UA14			Positive						Male						65				2				Mandible								Mural								3				No recur
PSU-UA15			Negative						Male						24				2				Mandible								Mural								4				No recur
PSU-UA16			Negative						Male						42				7				Maxilla								Intraluminal								3				No recur
PSU-UA17			Negative						Female						14				1				Mandible								Mural								7				No recur
PSU-UA18			Positive						Female						19				6				Mandible								Mural								1.5				No recur
PSU-UA19			Negative						Male						26				6				Mandible								Intraluminal								2.5				No recur
PSU-UA20			Positive						Female						10				2				Mandible								Mural								3				No recur
PSU-UA21			Negative						Female						59				1				Maxilla								Mural								3				No recur
PSU-UA22			Negative						Male						17				14				Mandible								Mural								5				No recur
PSU-UA23			Positive						Male						10				1				Mandible								Mural								5				No recur
PSU-UA24			Positive						Male						21				5				Mandible								Mural								3				No recur
PSU-UA25			Positive						Male						14				24				Mandible								Mural								2				No recur
PSU-UA26			Positive						Male						6				2				Mandible								Mural								2				No recur
PSU-UA27			Negative						Female						8				3				Maxilla								Luminal								2				No recur
PSU-UA28			Negative						Male						14				0.5				Mandible								Mural								5				No recur
PSU-UA29			Negative						Female						22				12				Mandible								Intraluminal								5				No recur
Denoted: PSU; Prince of Songkhla University, UA; Unicystic ameloblastoma, IHC; Immunohistochemistry
